# Supplementary material
Source: HighWire-hosted journal article supplement (http://www.cmaj.ca/highwire/filestream/72670/field_highwire_adjunct_files/3/181173-res-4-at.pdf)
Supplement: 181173-res-4-at.pdf [file 181173-res-4-at.pdf]

#### Appendix 4 (as supplied by the authors)

Supplemental File 5: Table describing selected alerts generated from volunteer populated reports,  $n=149$

| Alert variable                           | Proportion of sample with the alert, 149(%) |
|------------------------------------------|---------------------------------------------|
| Suboptimal physical activity             | 124 (78.5%)                                 |
| Clock score*                             | 98 (62.0%)                                  |
| Advance care planning                    | 85 (53.8%)                                  |
| Nutritional risk                         | 74 (46.8%)                                  |
| Loses control of bladder                 | 56 (35.4%)                                  |
| Five or more meds                        | 55 (34.8%)                                  |
| Forgets meds                             | 40 (25.3%)                                  |
| Memory                                   | 36 (22.8%)                                  |
| Fall within last year                    | 35 (22.2%)                                  |
| Sad or depressed                         | 21 (13.3%)                                  |
| Major manifest limitation in walking 2km | 20 (12.7%)                                  |

Note. \*clock score alert generated at high level due to early under-recognized administrative challenges in volunteer administration of clock draw exercise. These challenges were taken into account by huddle group when interpreting this finding.
